# Supplementary material
Source: Research Square preprint supplement (doi:10.21203/rs.3.rs-8902794/v1)
Supplement: Supplementary file 1 [file 43586b78fe4ac958e9f6935c.xlsx]

## Sheet: Huh7.5.1 cells
Supplementary Table 1: Summarized metabolomics data obtained from Huh7.5.1 cells infected with CHIKV at MOI of 0.2, 2, and 20 for 8 hpi.
	Metabolite name from Huh7.5.1 cells infected with CHIKV	MOI 0.2		MOI 2		MOI 20
HMDB ID		Average Log2 FC	p-value (-log10)	Average Log2 FC	p-value (-log10)	Average Log2 FC	p-value (-log10)
HMDB0002183	(4Z,7Z,10Z,13Z,16Z,19Z)-4,7,10,13,1 6,19-Docosahexaenoic acid					-0.181	0.147
HMDB0000694	(S)-2-Hydroxyglutarate					0.359	0.049
HMDB0007865	1,2-dioleoyl-sn-Glycero-3-Phosphate					-1.06	0.872
	1,2-dipalmitoyl-sn-glycero-3-PC	-0.288	0.322			-0.733	2.374
	10-Pyrene-PC			0.709	0.202
HMDB0004667	13(R)-HODE			-1.022	1.415	0.164	0.107
HMDB0244507	13E-Docosenamide					-0.198	0.018
HMDB0244507	13Z-Docosenamide			1.206	0.789
HMDB0002685	17,20-dimethyl Prostaglandin F1α					0.172	1.825
HMDB0000429	17a-Estradiol	-0.603	1.841
	1-hexadecylpyridinium	0.99	2.368	0.063	0.388
HMDB0002017	1-Phenylethylamine	-0.178	3.32
HMDB0008048	1-Stearoyl-2-Arachidonoyl PC					-0.389	0.881
HMDB0341116	2-Amino-p-cresol			0.858	0.495
HMDB0000466	3-Methylindole	0.622	1.343
HMDB0000479	3-Methyl-L-histidine					0.058	0.802
HMDB0006248	5-L-Glutamyl-L-alanine					-0.198	1.432
HMDB0001173	5'-Methylthioadenosine			2.782	2.854
HMDB0000267	5-Oxo-D-Proline			2.238	2.295
HMDB0000503	7a-Hydroxy-3-oxo-5b-cholanoic acid	1.234	1.801			0.487	0.175
HMDB0000501	7-Ketocholesterol					0.088	1.09
HMDB0001107	7-Methylguanosine					0.964	0.395
	8,9-EE-14(Z)-E					-0.463	0.356
HMDB0031003	9-Decenoic acid					-0.148	0.049
HMDB0004701	9R,10S-EpOME	1.27	2.403
HMDB0011757	Acetyl-DL-Valine					1.067	0.818
HMDB0000034	Adenine			2.743	2.58	1.609	0.441
HMDB0000050	Adenosine			-0.048	0.037
HMDB0001178	Adenosine 5'-Diphosphoribose			0	1.6
HMDB0000045	Adenosine 5'-monophosphate	3.541	3.05	1.614	0.789
	Ala Ala Lys					0.036	0.489
	Ala Gln Val Lys Gly	0.297	1.062
	Ala Pro Asn			2.539	0.89
	Ala Val Lys					-0.007	0.449
HMDB0001043	Arachidonic Acid (peroxide free)	2.552	2.671
	Arachidonoyl PAF C-16					-0.571	0.738
	Arachidonoyl thio-PC					-0.274	0.811
	Arg Glu Lys Asp Lys	0.672	1.269			-1.081	0.185
	Arg Leu Gly	0	2.079
HMDB0028722	Arg Val					2.683	0.357
	Arg-Lys-Glu-Val-Tyr					-0.748	0.199
HMDB0000706	Asn Phe			-0.251	0.331
	Asp Arg Lys Lys					-0.131	1.493
HMDB0028753	Asp Gly			0.434	0.638	0.168	0.619
HMDB0028766	Asp val			2.373	1.397
HMDB0249243	BiS-(2-ethylhexyl)-phthalate			0.577	0.189
HMDB0000058	cAMP	0.534	0.784	1.26	2.27
HMDB0000064	Creatine			-1.153	1.258
HMDB0000641	D/L-glutamine			0.304	0.113
HMDB0251528	D/L-proline			-0.648	0.618	-1.314	2.491
	dehydroabietadienol			-5.19	1.385	0.053	0.428
HMDB0000626	Deoxycholic acid			1.203	0.846
HMDB0060180	D-Glycerate 3-phosphate			0	1.675
HMDB0000076	dihydrouracil			-0.064	0.317
HMDB0000719	DL-Homoserine					1.138	0.413
HMDB0013609	DL-Tryptophan					1.188	1.675
	Docosyl acetate			1.225	0.47
	Dodecylphosphocholine					-0.031	0.364
HMDB0250791	D-phenylalanine	-0.713	0.611	1.27	1.717
	Eicosapentaenoic Acid methyl ester	0.216	1.547
	enantio-PAF C-16			0.646	0.197
HMDB0005015	Gabapentin	0.064	0.984	0.538	1.382	0.226	0.809
HMDB0029147	Gamma-Glutamylglutamine	-0.097	1.449
HMDB0028790	Gln Ala	0.114	0.167	-1.223	0.806
HMDB0028797	Gln Gly					-0.02	0.209
	Gln Lys Leu	-0.406	3.538
	Gln Met Gly					-0.069	0.262
HMDB0003764	Glu Ala			3.265	3.429
HMDB0000148	Glutamic acid			-0.142	1.426
HMDB0000125	Glutathione	-2.125	1.709	1.123	0.594
	Gly Val Arg	0	0.755
HMDB0000086	Glycerophosphocholine	-2.273	3.864	-0.281	0.35
HMDB0000721	Glycylproline			-2.193	0.794
	His Phe Ile Lys					1.251	0.621
	His Trp Asp His Leu	-0.095	0.388
HMDB0000732	Hydroxykynurenine	-0.096	1.496
HMDB0000733	Hyodeoxycholic acid	1.362	1.557
	Ile Arg Asp	0.516	0.938
	Ile His Pro Lys Asn					-0.694	0.05
	Ile Lys Arg Asp Phe					-1.062	1.63
	Ile Lys Leu	0.325	0.616			-0.066	1.286
HMDB0003320	Indole-3-carboxylic acid			-1.557	0.707
HMDB0000734	indoleacrylic acid	-0.357	3.191	0.962	1.948
HMDB0000175	Inosine 5'-monophosphate (IMP)			2.545	2.18
	Leu Tyr Val Lys	0.352	2.313			0.592	0.677
HMDB0060475	L-Glutamate					-0.38	2.608
HMDB0000641	L-glutamine			0.181	0.654
HMDB0000177	L-histidine			0.872	1.106	-1.234	0.606
HMDB0000172	L-isoleucine	0.052	1.078	-0.485	0.834	0.898	0.323
HMDB0000159	L-Phenylalanine					1.188	1.859
HMDB0000716	L-Pipecolic acid			-0.486	0.664
HMDB0000167	L-threonine / Homoserine	-0.01	0.657	1.25	1.647
HMDB0000929	L-Tryptophan	1.748	1.965	1.124	2.007
HMDB0000158	L-Tyrosine	0.07	1.071	-0.412	0.808	0.336	1.399
	Lys Glu Arg Phe Ala					-0.427	0.002
	Lys His Asp					0.903	0.547
	Lys Lys Lys					0.013	0
	Lys Phe Phe			1.183	0.901
	Lys Tyr Tyr Arg Val					-0.697	0.83
	Lyso-PAF C-16					-0.521	0.195
	Lyso-PAF C-18					2.365	0.068
HMDB0000765	Mannitol			0.019	0.362
	Met Asn Ala	1.126	1.93
	Methyl dehydroabietate					-0.134	0.263
	Methylcarbamyl PAF C-8					0.533	0.398
	Mz 1011.6					0.044	0.573
	Mz 107.6					0.024	0.311
	Mz 108.082	-0.817	2.698	0.199	1.012
	Mz 114.09409	-0.853	1.669
	Mz 115.965			0.742	0.346
	Mz 121.6					-0.001	0.632
	Mz 122.097			0.363	1.582
	Mz 123.09899	0.474	1.212
	Mz 129.6					-0.012	0.732
	Mz 130.6					-0.126	0.223
	Mz 135.6					0.027	0.312
	Mz 136.113	-0.818	2	0.376	1.549
	Mz 144.984	-1.39	0.97	-2.169	1.381
	Mz 145.9					0.004	0.26
	Mz 149.0			2.481	0.823	0.522	0.338
	Mz 157.6					0.11	0.814
	Mz 157.9					-0.67	0.422
	Mz 158.005			-0.616	0.891
	Mz 158.006	-2.248	1.752	-0.833	1.227
	Mz 158.965	1.337	1.85	-0.357	0.589
	Mz 162.0629	0.058	1.143
	Mz 171.151	-0.238	0.991	0.076	0.643
	Mz 182.963	-0.944	4.369	-0.117	0.633
	Mz 185.115			0.214	0.301
	Mz 185.117			0.804	1.488
	Mz 186.13541	-0.081	0.908
	Mz 191.09014	-2.532	0.736
	Mz 200.18			0.265	0.484	-0.015	0.307
	Mz 200.20525	1.139	2.138
	Mz 204.09097	-0.84	1.626
	Mz 215.130			-0.225	0.358
	Mz 216.92797	-0.973	0.802	-0.19	0.279
	Mz 217.107			0.034	0.279
	Mz 217.10943	1.158	0.749
	Mz 222.117			-1.485	1.003
	Mz 225.2					0.069	0.316
	Mz 225.6					0.24	0.902
	Mz 226.22141	0	1.642
	Mz 226.2217	-0.318	2.552
	Mz 226.95697	1.703	1.902
	Mz 228.20069	-0.27	1.039
	Mz 228.27393	-0.144	2.672
	Mz 234.2			1.749	1.167
	Mz 253.2					0.06	0.395
	Mz 254.25355	1.199	1.391
	Mz 272.6					-0.038	0.725
	Mz 273.170			0.412	0.556
	Mz 280.26885	1.396	1.937
	Mz 282.28546	0.308	0.704
	Mz 287.27539	-0.108	1.593
	Mz 289.21822	-0.136	2.11
	Mz 298.35322	-0.935	1.759
	Mz 298.35451	1.844	2.678
	Mz 301	1.113	1.538			0.463	0.102
	Mz 331.209			0.928	0.426
	Mz 338.34892	1.875	2.373
	Mz 340.3					-0.041	0.012
	Mz 341.27344	1.696	2.525
	Mz 349					0.049	0.654
	Mz 361.6					0.24	0.615
	Mz 362.93491	1.129	1.797
	Mz 368.6					-1.011	0.91
	Mz 429.3					1.016	0.77
	Mz 429.6					0.26	0.513
	Mz 430.92456	1.912	2.02
	Mz 485.1214	0.486	2.227
	Mz 496.35014	0.728	0.895
	Mz 497.6					0.341	0.809
	Mz 498.91331	2.118	2.102
	Mz 523.4					0.588	1.231
	Mz 559.1	0.762	1.744	0.952	0.62	0.027	0.415
	Mz 565.6					0.264	0.798
	Mz 566.9026	2.084	2.509
	Mz 629.1					-0.07	0.786
	Mz 632.2					-0.012	0.615
	Mz 633.16334	1.636	2.206
	Mz 633.6					0.266	0.768
	Mz 634.89194	1.037	1.409
	Mz 689.6					-1.206	0.868
	Mz 701.57458	1.149	1.498			0.377	0.925
	Mz 702.6					-1.378	0.312
	Mz 702.864			1.197	0.594
	Mz 702.88061	0.48	1.612
	Mz 703.59054	-0.939	1.04
	Mz 704.5	-0.387	0.784			-0.845	0.951
	Mz 726.5					-0.788	0.199
	Mz 729.6					-0.868	1.72
	Mz 730.55439	-0.433	3.573
	Mz 738.5					-1.236	0.125
	Mz 739.6					-1.439	0.933
	Mz 755.6					-1.076	1.574
	Mz 760.6	-0.441	3.001			-0.282	1.269
	Mz 762.5					-1.077	0.653
	Mz 763.6					-1.034	1.247
	Mz 765.6					-1.297	0.621
	Mz 766.55242	1.139	3.326
	Mz 770.87011	1.577	1.947
	Mz 772.5997	2.007	2.297
	Mz 779.6					-0.62	0.316
	Mz 780.56959	-0.918	0.39
	Mz 781.188	-1.679	1.726	0.405	0.128
	Mz 781.6					0.648	0.151
	Mz 785.6					-0.223	0.203
	Mz 786.61843	-1.886	2.238
	Mz 789.6					-1.384	0.22
	Mz 790.55375	-1.114	1.01
	Mz 802.5521	-0.647	0.902
	Mz 803.6					-1.508	1.002
	Mz 804.6					-0.778	0.17
	Mz 805.6					-1.073	0.132
	Mz 806.58556	-1.459	1.279
	Mz 819.6					-0.847	0.898
	Mz 830.6					-0.916	0.105
	Mz 831.6					-1.147	0.786
	Mz 838.85929	1.453	1.744
	Mz 845.6					-1.059	0.741
	Mz 850.57204	-0.196	3.399
	Mz 875.6					-0.22	0.067
	Mz 876.58707	-0.169	1.271
	Mz 887.6					-0.883	1.888
	Mz 918.56044	1.094	1.458
	Mz 955.6					-0.081	0.682
	Mz 971.6					-0.194	0.769
	N-3-oxo-hexadec-11(Z)-enoyl-L-Homoserine lactone	0.803	3.118	1.259	1.194
HMDB0000215	N-Acetyl-D-glucosamine	-0.193	2.189			-0.075	0.006
HMDB0002931 / HMDB0003339	N-Acetyl-DL-serine / L-glutamate	0.158	0.357
HMDB0094701	N-Acetylproline					0.586	0.048
HMDB0000221	NADPH	2.022	1.738			-0.275	1.075
	N-butyryl-L-Homocysteine thiolactone					0.976	1.478
HMDB0243828	n-Pentadecylamine			-2.333	0.365	0.215	0.049
HMDB0000782	Octadecanedioic acid	-0.443	2.223
HMDB0002117	Oleamide	0.103	0.8	-0.502	0.292	-0.029	0.356
HMDB0002088	Oleoyl Ethanolamide					0.67	0.904
	Oleoyl Ethyl Amide	1.009	1.173	-1.389	0.297	-0.167	0.636
HMDB0062195	PAF C-16	1.375	2.082
HMDB0000220	Palmitic acid	1.059	1.906	-0.069	0.129
HMDB0012273	Palmitic amide	2.861	2.718	-0.203	0.29	0.06	0.848
	Palmitoyl Ethanolamide-d4					0.247	0.069
	Palmitoyl N-Isopropylamide			-0.065	0.534	-0.28	1.496
HMDB0000210	Pantothenic acid	-0.078	1.782	1.547	2.732	0.838	0.095
	PC 16:1e; PC 14:1e/2:0; [M+H]+			1.691	0.896	0.332	0.016
	PC 18:1e; PC 16:1e/2:0; [M+H]+			1.081	0.452
HMDB0009095	PC 36:5; PC 18:2-18:3; [M+H]+			0.799	0.293
HMDB0007991	PC 38:6; PC 20:1-18:5; [M+H]+			1.218	0.398
HMDB0011206	PC(16:0/0:0)[U] / PC(16:0/0:0)[rac]			1.018	0.379	0.499	0.143
HMDB0011309	PC(18:1(9Z)/18:1(9Z))			0.642	0.171
HMDB0008172	PC(18:3(6Z,9Z,12Z)/18:3(6Z,9Z,12Z))					0.003	0.8
HMDB0008511	PC(20:5(5Z,8Z,11Z,14Z,17Z)/20:5(5Z,8Z,11Z,14Z,17Z))					-0.58	1.05
	PE 38:4; PE 19:2-19:2; [M+H]+			0.299	0.065
	PE 38:5; PE 20:0-18:5; [M+H]+			1.574	0.414
	PE 40:7; PE 20:3-20:4; [M+H]+			1.642	0.427
	PE(14:0/19:0cycw8c)			1.27	0.376
	PE(16:0/19:0)			-0.015	0.036
HMDB0011506	PE(18:1(9Z)/0:0)	-0.131	1.262			0.127	1.184
	PE(19:0cycv8c/16:1(9Z))			1.021	0.321
	PE(19:1(9Z)/0:0)	1.295	2.719
HMDB0261343	PE(19:iso/18:1(9Z))			0.636	0.163
	Phe Cys Leu Phe Arg	-0.255	5.047			0.219	0.961
HMDB0001565	Phosphocholine	0.072	0.201	0.997	0.733	2.223	1.237
HMDB0000272	Phospho-L-serine			0.086	0.183
	PLC thio-PIP2			0.977	0.532
	Pro Ala Gln					0.045	0.328
HMDB0253028	Pro Leu			0.184	0.339	0.098	4.585
HMDB0029026	Pro Ser			0	2.752	1.075	1.238
HMDB0029030	Pro Val	-0.845	0.747	2.22	1.84
HMDB0256934	Pyocyanin					1.31	0.409
HMDB0000267	Pyroglutamic acid	-0.096	0.655			-1.206	1.429
HMDB0003072	Quinate	-0.799	1.42
HMDB0001852	Retinoic acid					-0.077	0.609
	Ser Asp Gln					0.22	0.091
HMDB0029032	Ser-Ala-OH			2.044	1.519	0.457	1.832
	SM d34:2; SM d22:2/12:0; [M+H]+			0.59	0.36
HMDB0061712	SM(d18:1/16:0)			1.834	0.435
HMDB0001256	Spermine	0.547	1.116	0.311	0.629	0.028	0.086
HMDB0034146	Stearamide	1.079	1.683	-0.034	0.235	-0.243	0.792
HMDB0002003	Tetracosanoic acid	-0.789	1.027
HMDB0029064	Thr Ile	-0.257	1.152	0.422	0.637	0.147	1.1
HMDB0029070	Thr Ser			3.061	2.704
HMDB0029071	Thr Thr			2.145	1.625
	Thr Val Leu Thr Ser					0.451	0.61
HMDB0029080	Trp Cys					0.339	0.169
	Tyr Phe Asn					1.176	0.41
HMDB0000295	Uridine diphosphate (UDP)					-0.264	1.228
HMDB0000290	Uridine diphosphate-N-acetylglucosamine	-0.773	1.565			0.094	0.149
	Val Val Lys					0.033	1.145
HMDB0000892	Valeric acid					1.217	1.28
	ZK118182 isopropyl ester					0.694	0.105

## Sheet: Vero E6 cells
Supplementary Table 1: Summarized metabolomics data obtained from Vero E6 cells infected with CHIKV at MOI of 0.2, 2, and 20 for 8 hpi.
	Metabolite name from Vero E6 cells infected with CHIKV	MOI 0.2		MOI 2		MOI 20
HMDB ID		Average Log2 FC	p-value (-log10)	Average Log2 FC	p-value (-log10)	Average Log2 FC	p-value (-log10)
HMDB0000694	(S)-2-Hydroxyglutarate					-0.025	0.029
HMDB0007865	1,2-dioleoyl-sn-Glycero-3-Phosphate					-0.391	0.347
	1,2-dipalmitoyl-sn-glycero-3-PC	-0.496	2.314			-0.296	0.174
	10-Pyrene-PC			2.55	0.724
	11Z-hexadecenoic acid					0.089	0.552
HMDB0004667	13(R)-HODE			-1.025	2.033	-0.22	1.324
HMDB0244507	13E-Docosenamide					0.676	0.485
HMDB0244507	13Z-Docosenamide			1.945	1.621
HMDB0002685	17,20-dimethyl Prostaglandin F1α					-0.039	0.104
HMDB0000429	17a-Estradiol	0.369	0.734
	1-hexadecylpyridinium	1.256	1.413	-0.06	0.96
HMDB0002017	1-Phenylethylamine	-0.189	3.064
HMDB0341116	2-Amino-p-cresol			1.385	0.788
	2-O-methyl PAF C-18					0.087	0.308
HMDB0000466	3-Methylindole	-0.278	0.585			-0.265	0.671
HMDB0000479	3-Methyl-L-histidine					0.145	0.424
HMDB0006248	5-L-Glutamyl-L-alanine					-0.403	0.278
HMDB0000982	5-Methylcytidine					0.465	0.199
HMDB0001173	5'-Methylthioadenosine			1.934	1.873
HMDB0000267	5-Oxo-D-Proline			2.052	2.03
HMDB0000503	7a-Hydroxy-3-oxo-5b-cholanoic acid	1.404	1.677			0.915	1.659
HMDB0000501	7-Ketocholesterol					0.03	0.164
HMDB0001107	7-Methylguanosine					0.314	1.632
HMDB0031003	9-Decenoic acid					0.02	0.104
HMDB0004701	9R,10S-EpOME	0.988	1.402
HMDB0247961	Aconitic acid					0.115	0.338
HMDB0000034	Adenine			1.81	1.853	0.285	1.5
HMDB0000050	Adenosine			-0.539	0.885
HMDB0001178	Adenosine 5'-Diphosphoribose			1.526	0.925
HMDB0000045	Adenosine 5'-monophosphate	0.536	0.34	2.859	2.468
	Ala Ala Lys					0.049	0.286
	Ala Gln Val Lys Gly	0.385	1.112
	Ala Pro Asn			1.602	1.546
	Ala Val Lys					-0.069	0.372
HMDB0001043	Arachidonic Acid (peroxide free)	2.265	0.804
	Arachidonoyl PAF C-16					-0.102	0.655
	Arachidonoyl thio-PC					0.127	0.449
	Arg Glu Lys Asp Lys	0.87	0.804			0.277	0.315
	Arg Leu Gly	0.079	0.281
	Asn Cys Ala					-0.724	0.529
HMDB0000706	Asn Phe			-0.351	0.743
HMDB0028753	Asp Gly			-0.817	0.575	0.114	0.351
HMDB0028766	Asp val			-1.314	0.523
HMDB0249243	BiS-(2-ethylhexyl)-phthalate			2.433	1.38
HMDB0000058	cAMP	1.249	2.131	1.023	0.925
HMDB0000064	Creatine			-0.709	0.609	-0.439	0.974
HMDB0000641	D/L-glutamine			0.657	0.332
HMDB0251528	D/L-proline			-1.383	0.827
	dehydroabietadienol			0	1.987	0.048	0.372
HMDB0000626	Deoxycholic acid			2.012	1.726
HMDB0060180	D-Glycerate 3-phosphate			-1.387	0.995
HMDB0000076	dihydrouracil			-2.057	0.875
HMDB0000719	DL-Homoserine					0.32	1.643
HMDB0250791	DL-Phenylalanine	-0.554	0.461
HMDB0013609	DL-Tryptophan					0.515	1.505
	Docosyl acetate			1.86	0.876
	Dodecylphosphocholine					-0.096	0.262
HMDB0250791	D-phenylalanine			0.786	0.572
	D-Sorbitol					-0.118	1.097
	Eicosapentaenoic Acid methyl ester	0.53	1.007
	enantio-PAF C-16			1.65	0.661
HMDB0005015	Gabapentin	-0.294	0.349	0.434	0.948
HMDB0029147	Gamma-Glutamylglutamine	-0.224	1.834
HMDB0028790	Gln Ala	0.119	0.372	-3.159	1.675
	Gln Lys Leu	-0.399	2.4
HMDB0003764	Glu Ala			0.11	0.748
HMDB0000148	Glutamic acid			-0.736	1.139
HMDB0000125	Glutathione	-3.598	1.944	1.911	1.113
	Gly Met Asp					-0.141	0.467
	Gly Val Arg	-1.151	1.293
HMDB0000086	Glycerophosphocholine	-1.544	1.911	-0.187	0.693
HMDB0000721	Glycylproline			-2.954	0.907
	His Trp Asp His Leu	0.27	0.441
HMDB0000732	Hydroxykynurenine	-0.017	0.049
HMDB0000733	Hyodeoxycholic acid	1.959	1.604
	Ile Arg Asp	1.996	2.066
	Ile Arg Val					-0.235	0.394
	Ile Lys Arg Asp Phe					-0.808	0.833
	Ile Lys Leu	1.096	1.396			0.02	0.096
	Ile Thr Val					0.668	2.043
HMDB0003320	Indole-3-carboxylic acid			-3.372	1.349
HMDB0000734	Indoleacrylic acid	-0.214	1.446	0.369	0.469
HMDB0000175	Inosine 5'-monophosphate (IMP)			0.921	0.704
	Leu Tyr Val Lys	0.356	1.572			-0.022	0.159
	Leukotriene B4-3-aminopropylamide					-0.095	0.974
HMDB0000641	L-glutamine			0.477	1.231
HMDB0000177	L-histidine			0.542	0.304
HMDB0000172	L-isoleucine			-0.912	0.852	0.449	1.527
HMDB0000172	L-Leucine / isoleucine	-0.512	0.465
HMDB0000159	L-Phenylalanine					0.339	0.914
HMDB0000716	L-Pipecolic acid			-0.028	0.202
HMDB0000167	L-threonine / Homoserine	0.153	0.182	0.747	0.559
HMDB0000929	L-tryptophan	0.971	0.934	0.337	0.371
HMDB0000158	L-Tyrosine	-0.46	0.431	-0.788	0.943	0.306	0.925
	Lys Glu Arg Phe Ala					-0.223	0.984
	Lys His Asp					0.389	1.094
	Lys Lys Lys					0.013	0.051
	Lys Phe Phe			2.213	2.043
HMDB0000765	Mannitol			-0.723	0.921
	Met Asn Ala	1.036	1.878
	Mz 1011.6					-0.047	0.188
	Mz 108.082	1.493	1.667	0.63	2.318	0.011	0.054
	Mz 114.094	-1.204	2.14
	Mz 115.965			0.263	0.173
	Mz 122.097			0.659	1.915	-0.02	0.182
	Mz 123.098	1.116	1.751
	Mz 130.2					-0.618	0.179
	Mz 136.1	0.392	0.688	0.682	2.037	0.107	0.985
	Mz 144.9					0.063	0.446
	Mz 144.984	-1.387	1.09	-1.315	2.002
	Mz 149.023			1.17	1.269
	Mz 158.005			-0.436	1.017
	Mz 158.006	-2.276	1.339	-0.785	1.251
	Mz 158.9					0.04	0.173
	Mz 158.965	1.257	1.691	-0.765	1.134
	Mz 162.062	-0.157	0.166
	Mz 171.151	-0.094	0.714	-0.119	0.788
	Mz 182.963	-0.495	1.556	-0.02	0.02
	Mz 185.115			0.065	0.049
	Mz 185.117			0.941	1.823
	Mz 186.135	-0.198	1.273
	Mz 191.090	-1.123	0.507
	Mz 200.18			0.547	1.676	-0.071	0.139
	Mz 200.205	0.914	1.004
	Mz 204.090	-1.145	1.947
	Mz 215					-0.483	1.685
	Mz 215.130			-1.003	0.966
	Mz 216.9					0.023	0.09
	Mz 216.927	-0.221	0.642
	Mz 216.928			-0.788	0.494
	Mz 217.107	0.828	0.959	-0.017	0.687
	Mz 222.117			-2.475	0.948
	Mz 226.2					0.029	0.186
	Mz 226.2					-0.014	0.062
	Mz 226.221	0.016	0.089
	Mz 226.221	-0.124	0.763
	Mz 226.9					0.117	0.668
	Mz 226.95697	3.542	1.487
	Mz 228.200	-0.143	0.831
	Mz 228.273	-0.197	2.57
	Mz 228.3					-1.124	2.14
	Mz 232.2					-0.758	1.458
	Mz 234.2			1.466	1.516
	Mz 254.253	1.063	1.334
	Mz 273.170			-0.025	0.363
	Mz 273.2					0.032	0.218
	Mz 280.268	1.322	1.602
	Mz 282.285	0.572	1.147
	Mz 287.275	0.007	0.093
	Mz 289.218	-0.029	0.794
	Mz 298.353	-1.617	1.369
	Mz 298.354	0.427	0.331
	Mz 301.147	1.168	1.674
	Mz 317.2					-0.009	0.059
	Mz 331.209			0	1.965
	Mz 338.348	2.115	0.795
	Mz 341.273	1.61	2.219
	Mz 362.9					0.053	0.187
	Mz 362.934	1.073	1.64
	Mz 430.9					0.013	0.043
	Mz 430.924	1.662	0.801
	Mz 485.1					-0.019	0.079
	Mz 485.121	0.223	0.843
	Mz 496.350	1.882	0.927
	Mz 498.9					0.095	0.343
	Mz 498.913	2.956	1.212
	Mz 559.131			1.917	1.537
	Mz 559.141	0.807	0.878
	Mz 566.9	2.941	0.925			-0.005	0.025
	Mz 633.163	2.128	1.185			0.141	0.249
	Mz 634.891	0	0.937			-0.037	0.149
	Mz 701.574	3.263	1.465
	Mz 702.864			1.196	3.512
	Mz 702.880	2.877	1.018			-0.034	0.127
	Mz 703.590	-1.905	1.757			-0.064	0.053
	Mz 704.5	-0.428	1.374			-0.982	0.844
	Mz 718.6					-0.85	0.713
	Mz 722.5					-0.352	0.255
	Mz 730.554	-0.214	1.826			-0.813	0.836
	Mz 760.6	-0.052	0.131			-0.204	0.111
	Mz 766.552	0.149	0.373
	Mz 770.870	3.267	1.91			0.035	0.104
	Mz 772.599	2.327	1.204			-0.608	0.012
	Mz 780.569	-0.43	0.226			0.009	0.008
	Mz 781.188	-1.565	1.445	1.561	1.235	0.197	0.262
	Mz 782.6					-0.193	0.11
	Mz 786.6	-1.317	0.85			-0.201	0.106
	Mz 790.553	0	1.701
	Mz 802.552	-1.059	1.935
	Mz 806.585	-1.622	1.625			-0.348	0.281
	Mz 838.859	3.54	1.97
	Mz 850.572	-0.024	0.861
	Mz 850.6					-0.124	0.076
	Mz 876.587	-0.385	0.818			-0.092	0.056
	Mz 918.560	2.899	1.613
	N-3-oxo-hexadec-11(Z)-enoyl-L-Homoserine lactone	1.308	1.95	1.903	1.419
HMDB0000215	N-Acetyl-D-glucosamine	-0.564	1.346			-0.202	0.563
HMDB0002931 / HMDB0003339	N-Acetyl-DL-serine / L-glutamate	0.769	1.462
HMDB0094701	N-ACETYLPROLINE					0.012	0.057
HMDB0000221	NADPH	3.291	1.137			-0.31	0.179
	N-butyryl-L-Homocysteine thiolactone					0.395	2.07
HMDB0243828	n-Pentadecylamine			-0.172	0.7	-0.065	0.122
HMDB0000782	Octadecanedioic acid	-0.214	1.407
HMDB0002117	Oleamide	-0.064	0.568	-0.85	0.341	-0.082	0.651
HMDB0002088	Oleoyl Ethanolamide					0.249	0.402
	Oleoyl Ethyl Amide	0.215	0.382	-0.808	0.749
HMDB0255868	O-Succinyl-L-homoserine					-0.265	0.601
HMDB0062195	PAF C-16	1.254	1.918
HMDB0000220	Palmitic acid	3.014	1.168	0.47	0.236
HMDB0012273	Palmitic amide	2.716	0.987	-0.178	0.693	-0.046	0.339
	Palmitoyl Ethanolamide-d4					0.813	1.956
	Palmitoyl N-Isopropylamide			-0.244	1.273	0.39	1.328
HMDB0000210	Pantothenic acid	0.013	0.146	0.901	0.848	0.29	1.725
	PC 16:1e; PC 14:1e/2:0; [M+H]+			2.305	1.414	-0.612	3.111
	PC 18:1e; PC 16:1e/2:0; [M+H]+			0	1.344
HMDB0009095	PC 36:5; PC 18:2-18:3; [M+H]+			1.731	0.59
HMDB0007991	PC 38:6; PC 20:1-18:5; [M+H]+			1.347	0.444
HMDB0011206	PC(16:0/0:0)[U] / PC(16:0/0:0)[rac]			1.856	0.972	-0.71	2.953
HMDB0011309	PC(18:1(9Z)/18:1(9Z))			2.606	0.641
	PE 38:4; PE 19:2-19:2; [M+H]+			2.346	0.591
	PE 38:5; PE 20:0-18:5; [M+H]+			1.547	0.537
	PE 40:7; PE 20:3-20:4; [M+H]+			1.785	0.562
	PE(14:0/19:0cycw8c)			1.318	0.432
	PE(16:0/19:0)			2.36	0.523
HMDB0011506	PE(18:1(9Z)/0:0)	-0.138	1.386			-0.108	0.445
	PE(19:0cycv8c/16:1(9Z))			1.813	0.593
	PE(19:1(9Z)/0:0)	1.593	2.572
HMDB0261343	PE(19:iso/18:1(9Z))			2.588	0.671
	PGF2α Alcohol					0.066	0.157
	Phe Cys Leu Phe Arg	-0.058	0.82			0.2	0.248
HMDB0001565	Phosphocholine	0.759	1.653	-0.686	0.48	0.023	0.066
HMDB0000272	Phospho-L-serine			0.186	0.223
	PLC thio-PIP2			2.21	1.914
HMDB0253028	Pro Leu			-0.558	0.56	-0.083	0.063
HMDB0029026	Pro Ser			2.451	0.733	-0.007	0.019
HMDB0029030	Pro Val	-1.713	1.729	0.177	1.016
HMDB0256934	Pyocyanin					-0.264	0.556
HMDB0000267	Pyroglutamic acid	0.661	1.407			-0.422	1.664
HMDB0003072	Quinate	0.889	0.951
HMDB0001852	Retinoic acid					0.104	0.149
	Ser Asp Gln					-0.373	1.18
	Ser Val Gln Leu Leu					0.089	0.305
HMDB0029032	Ser-Ala-OH			1.746	1.308	0.394	0.691
	SM d34:2; SM d22:2/12:0; [M+H]+			1.587	0.553
HMDB0061712	SM(d18:1/16:0)			1.545	0.518
HMDB0001256	Spermine	0.772	0.863	-0.451	0.527	0.017	0.11
HMDB0034146	Stearamide	0	1.15	0.09	0.311	-0.01	0.023
HMDB0002003	Tetracosanoic acid	-1.622	1.315
	Thr His Ile Arg					0.099	0.174
HMDB0029064	Thr Ile	-0.399	2.487	-0.819	0.704	0.17	0.726
HMDB0029070	Thr Ser			2.161	1.693
HMDB0029071	Thr Thr			1.75	1.33
HMDB0029080	Trp Cys					-0.257	1.188
HMDB0002012	Ubiquinone-1					0.368	0.178
HMDB0000295	Uridine diphosphate (UDP)					0.23	0.797
HMDB0000290	Uridine diphosphate-N-acetylglucosamine	-1.098	1.997			0.13	0.969
	Val Leu Leu Gly Thr					0.172	0.367
	Val Val Lys					0.012	0.086
